# Supplementary material for: Conserved Responses in a War of Small Molecules between a Plant-Pathogenic Bacterium and Fungi
Source: PubMed Central journal article supplement (PMC5964348; doi:10.1128/mbio.00820-18), 2018-05-22
Supplement: mbo001183899sd1.pdf [file mbo001183899sd1.pdf]

**Figure A1.** NMR spectra of ralsolamycin. Each panel is labeled in the top left corner with experimental detail

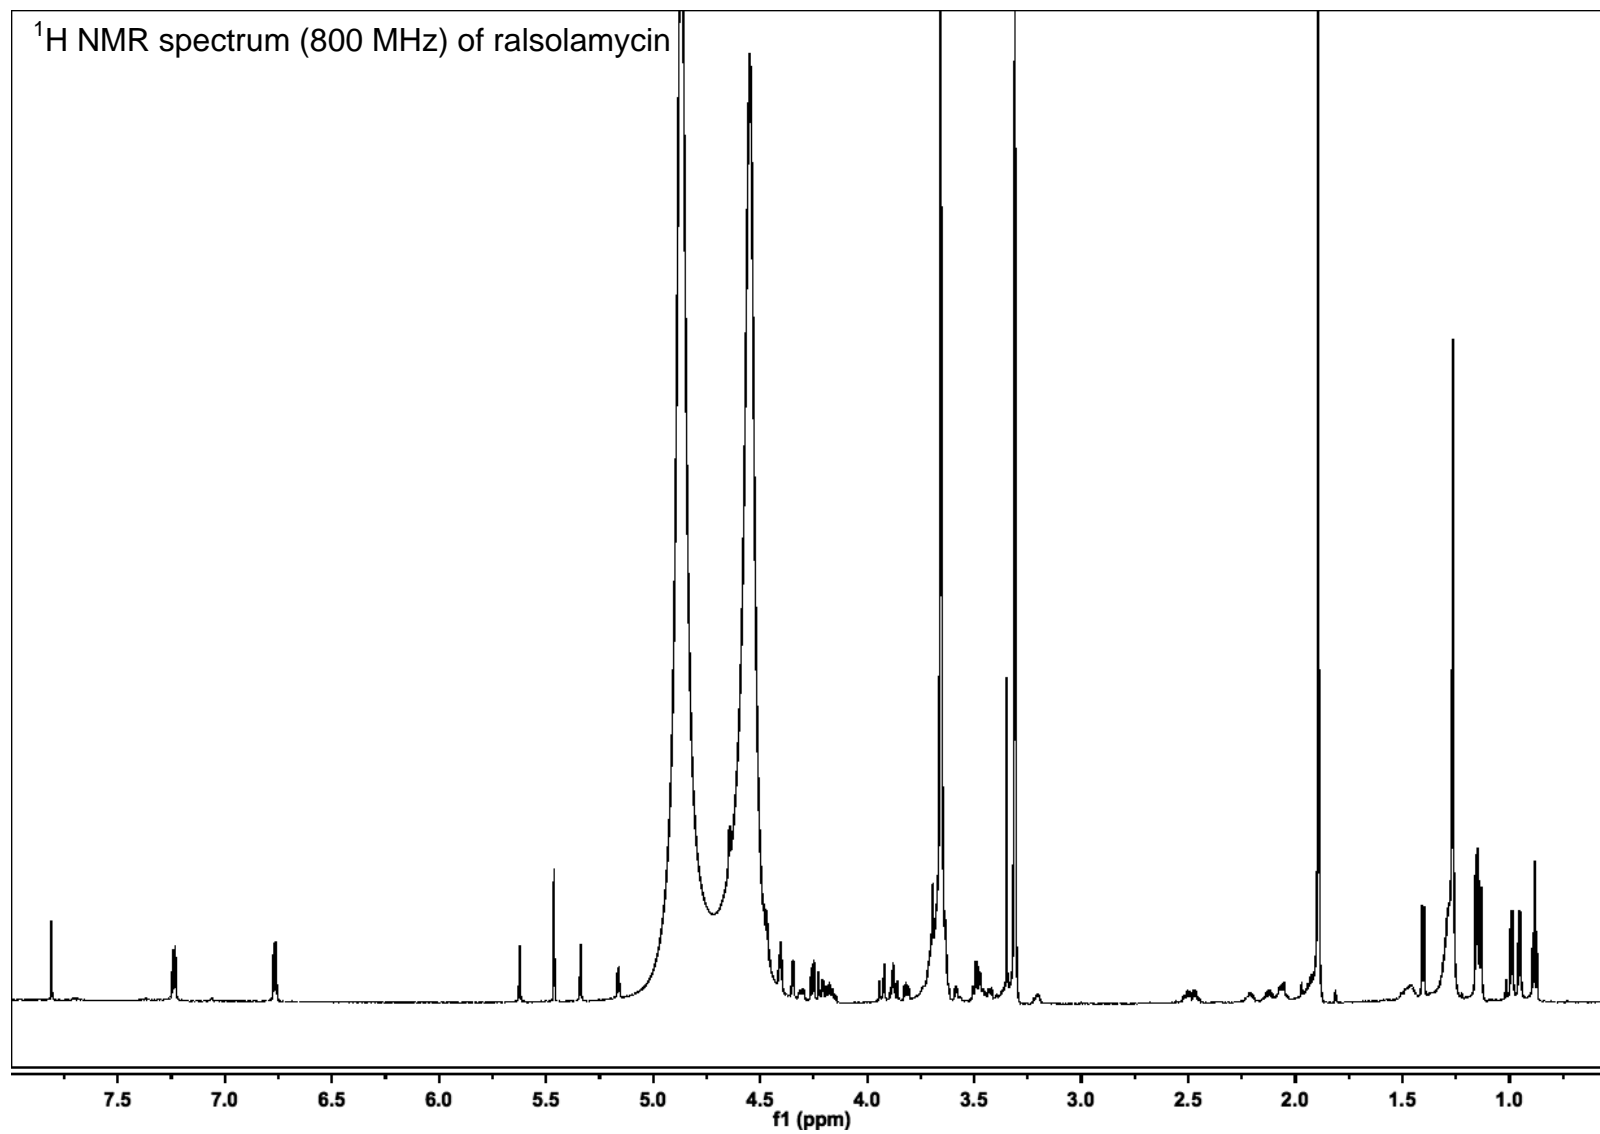

$^{13}\text{C}$  NMR spectrum (201 MHz) of ralsolamycin

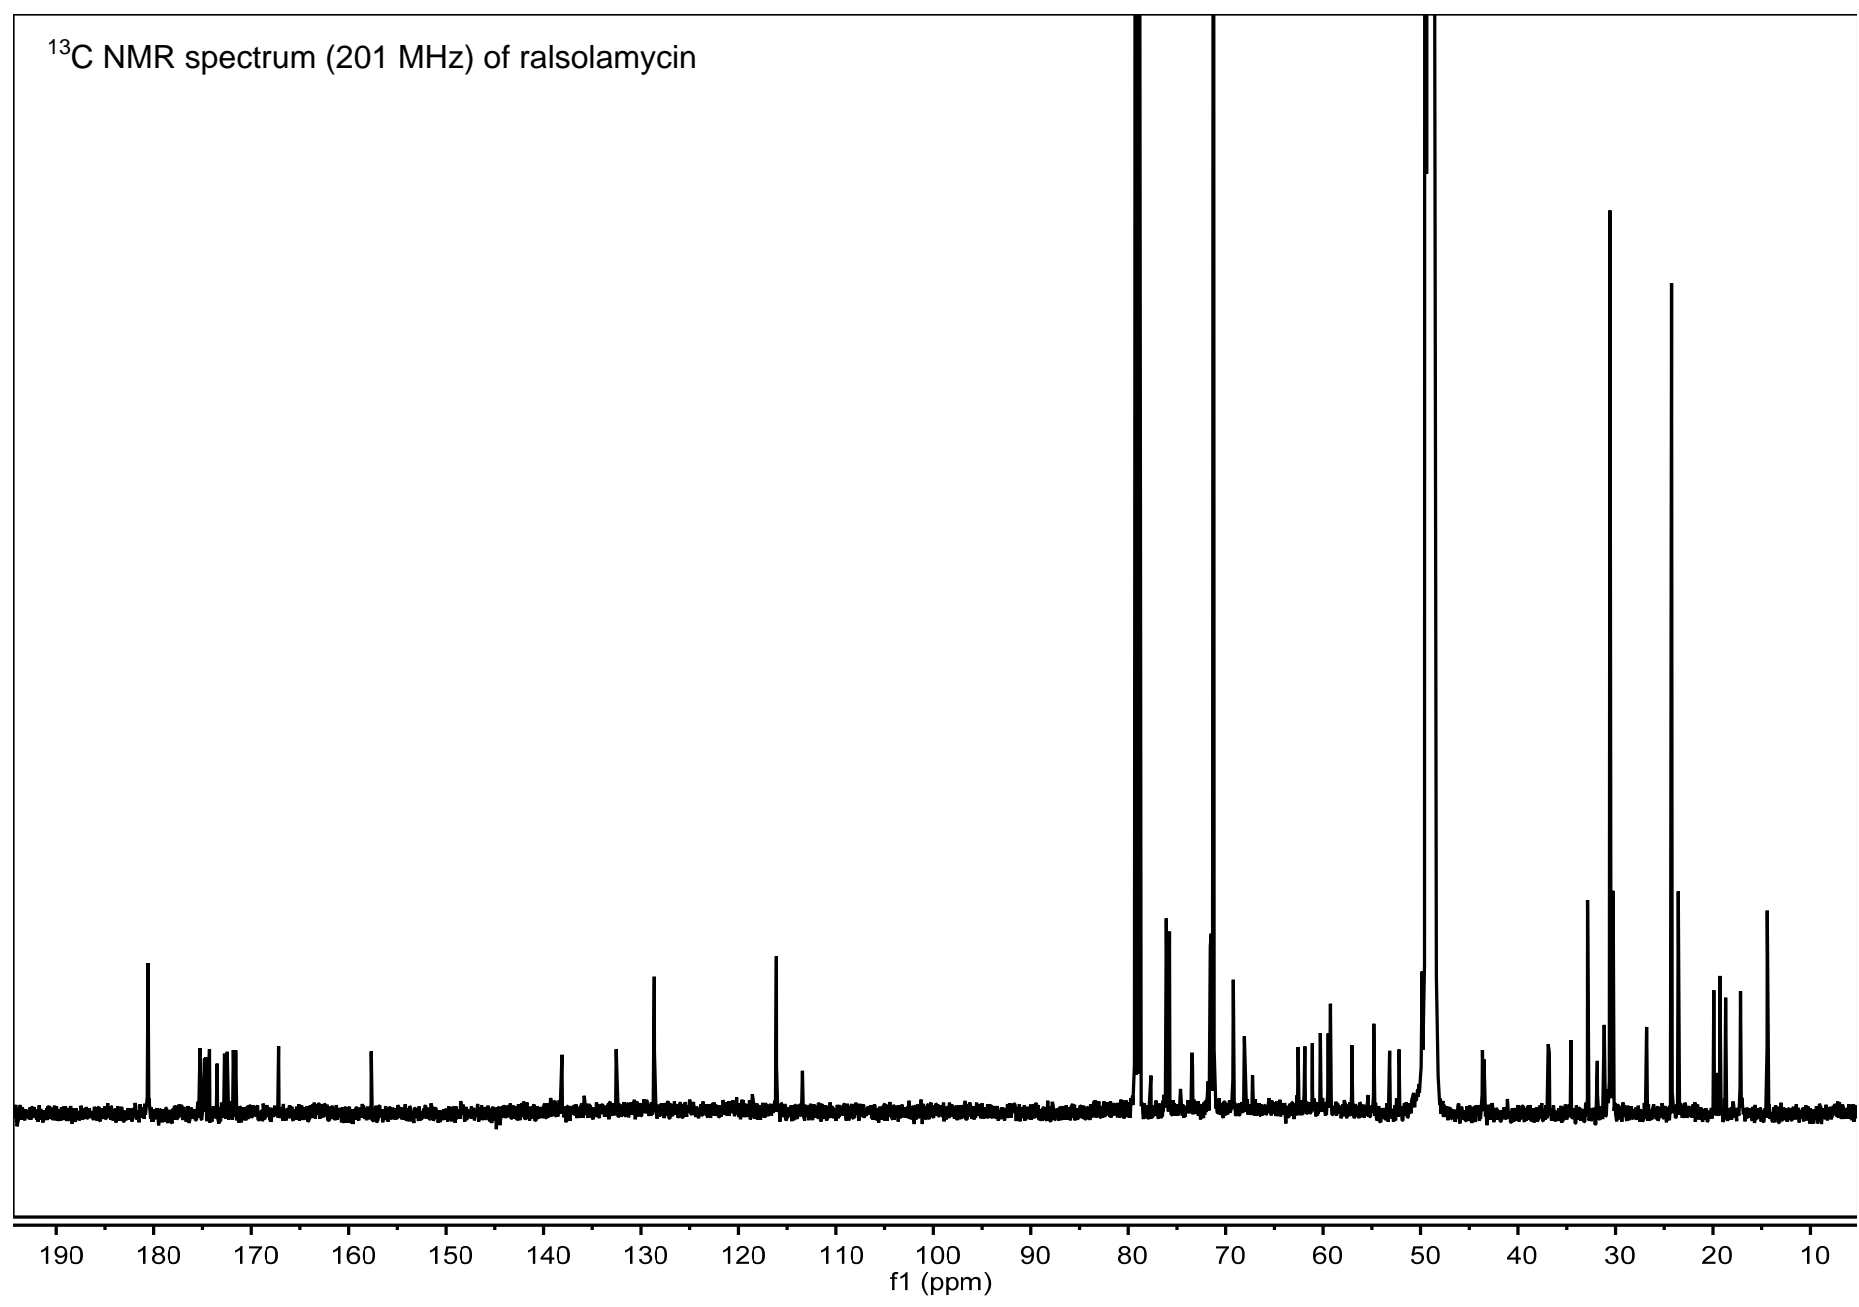

dqfCOSY spectrum (800 MHz) of ralsolamycin

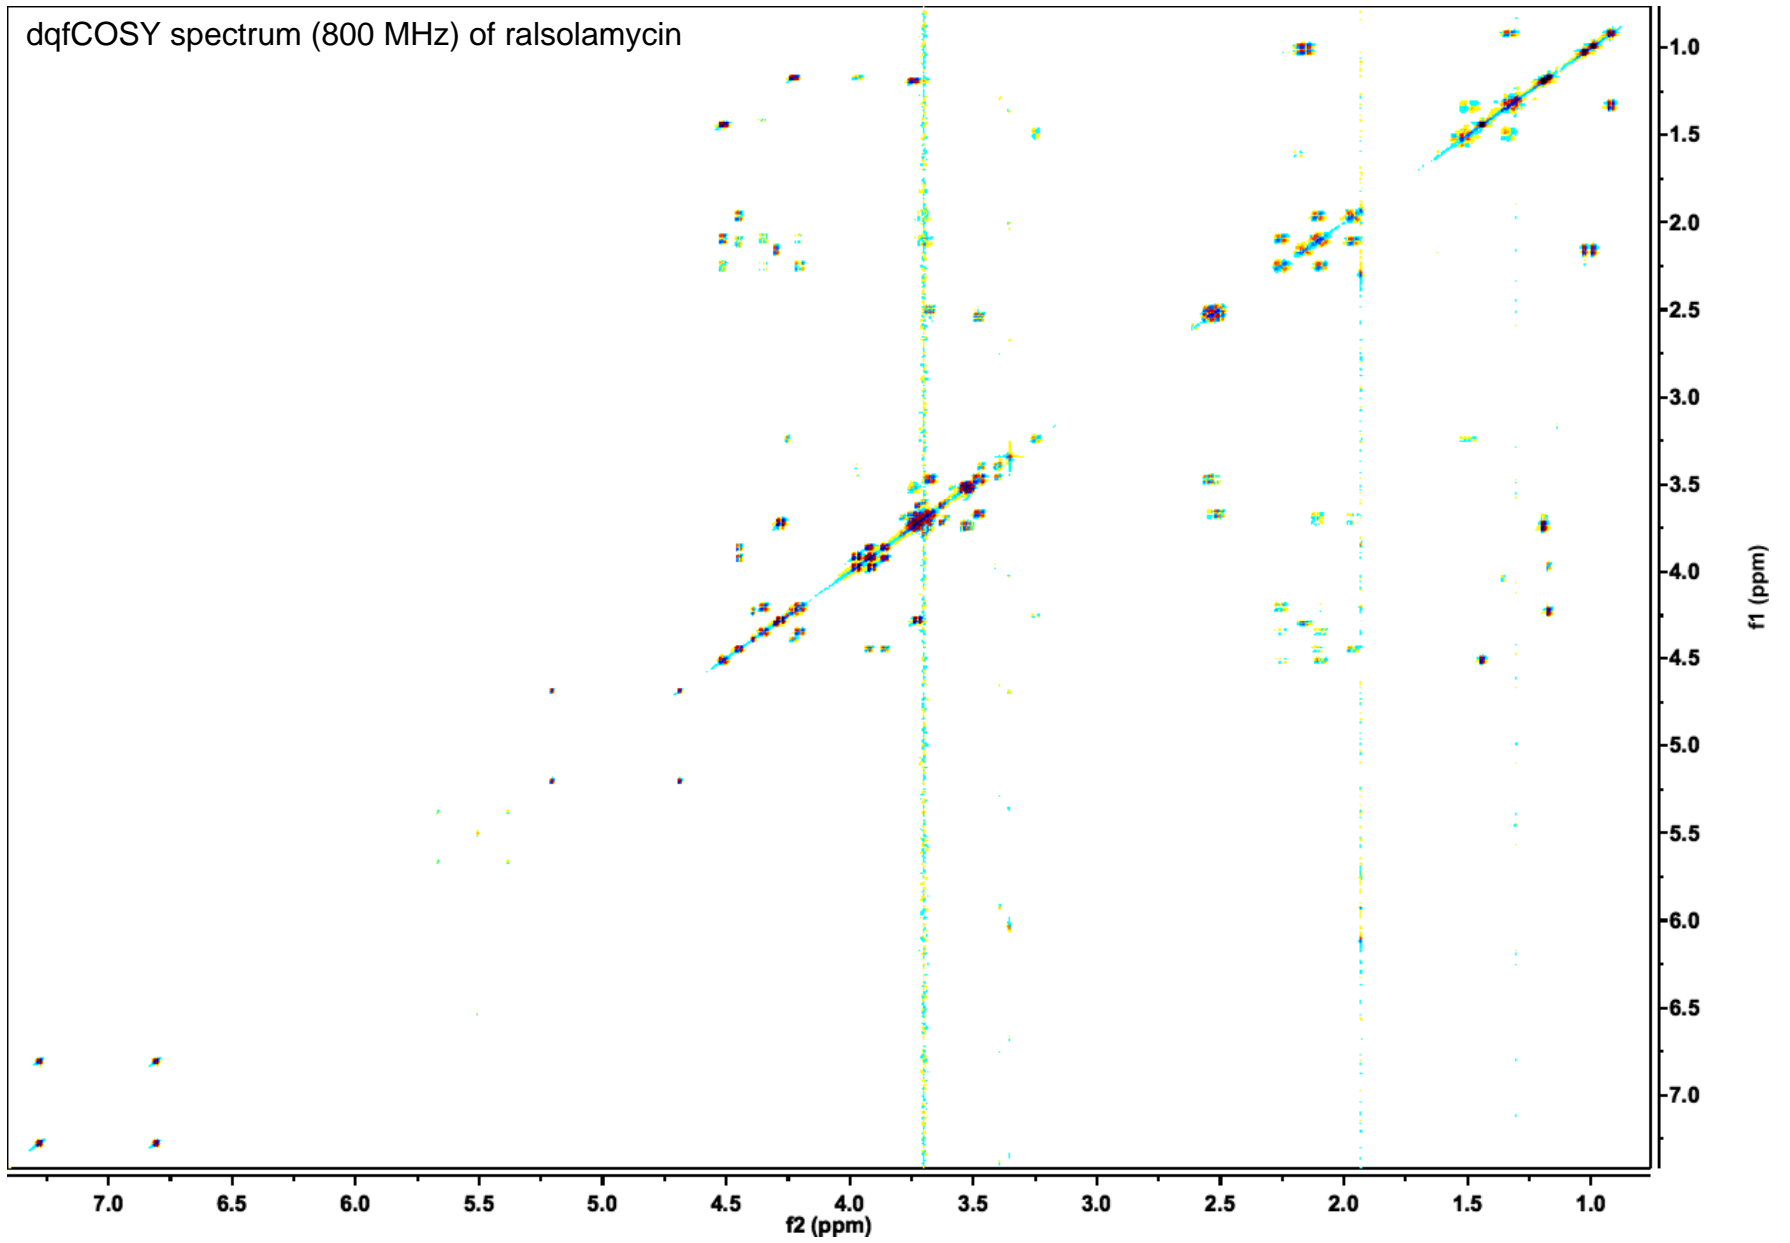

coupled-HSQC spectrum (800 MHz) of ralsolamycin

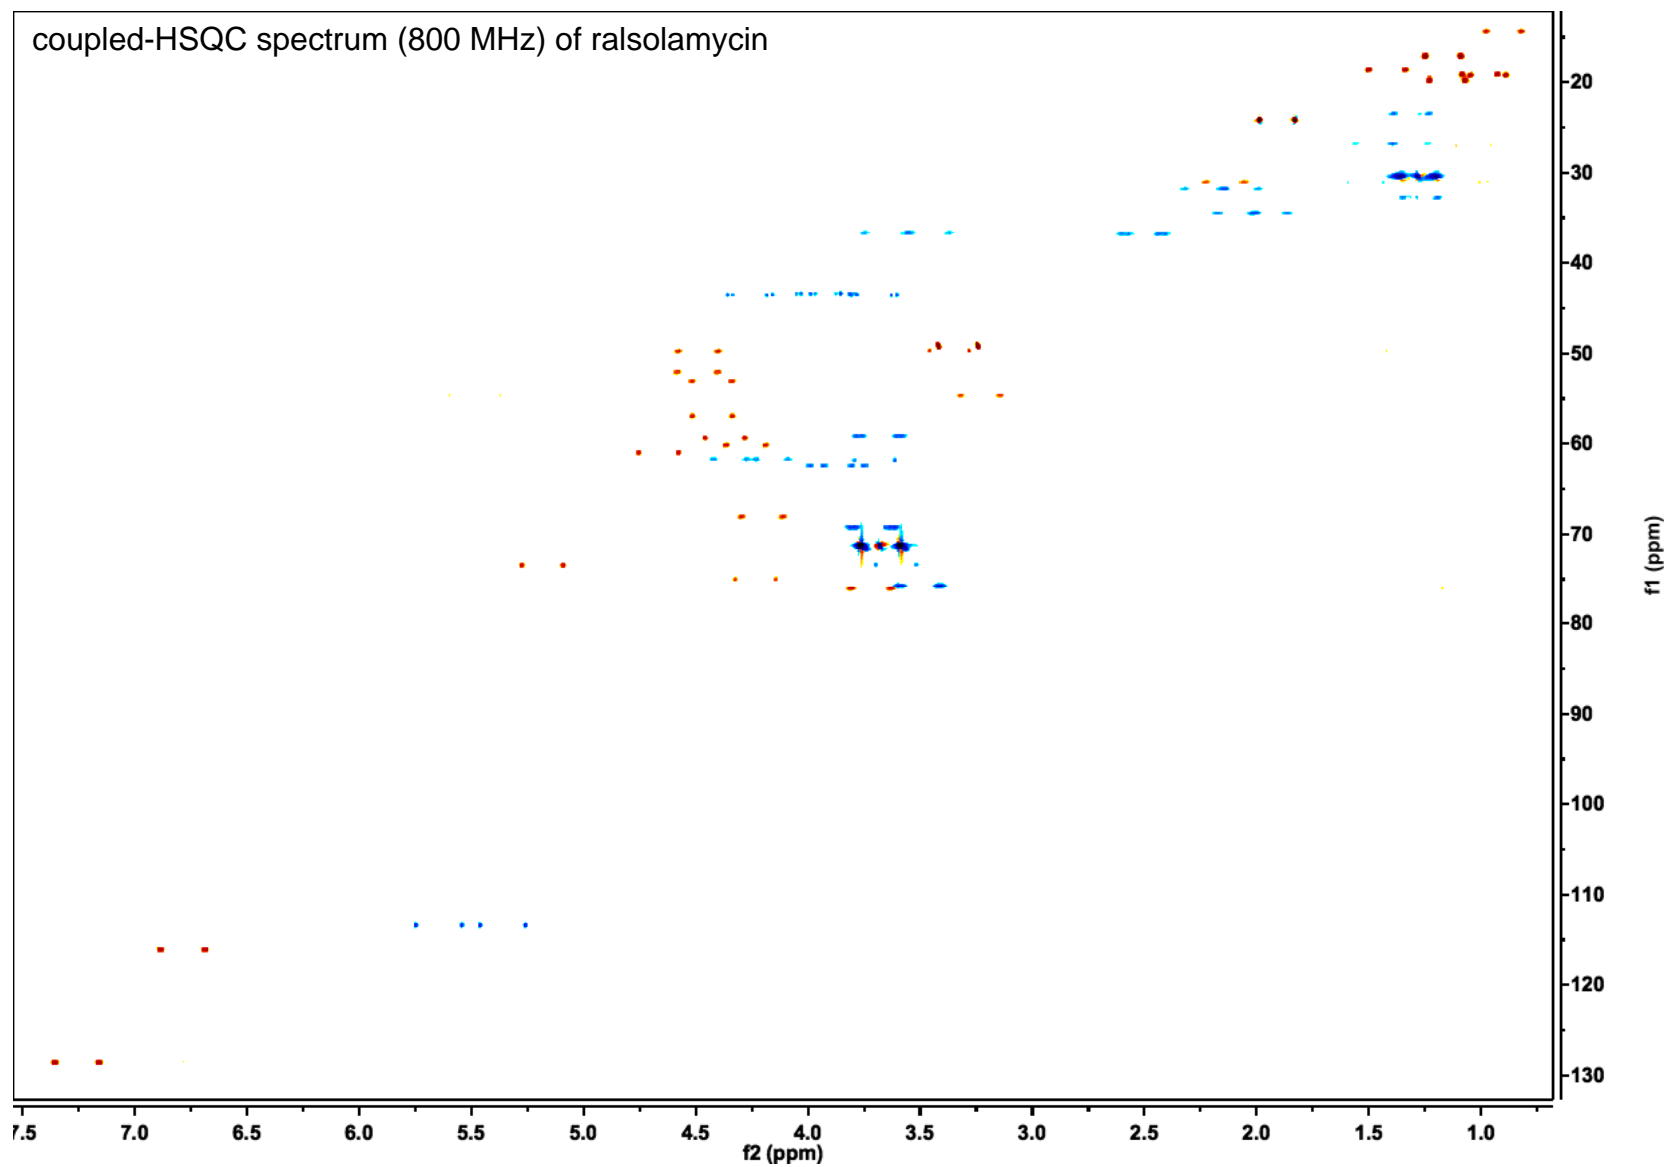

HMBC spectrum (800 MHz) of ralsolamycin

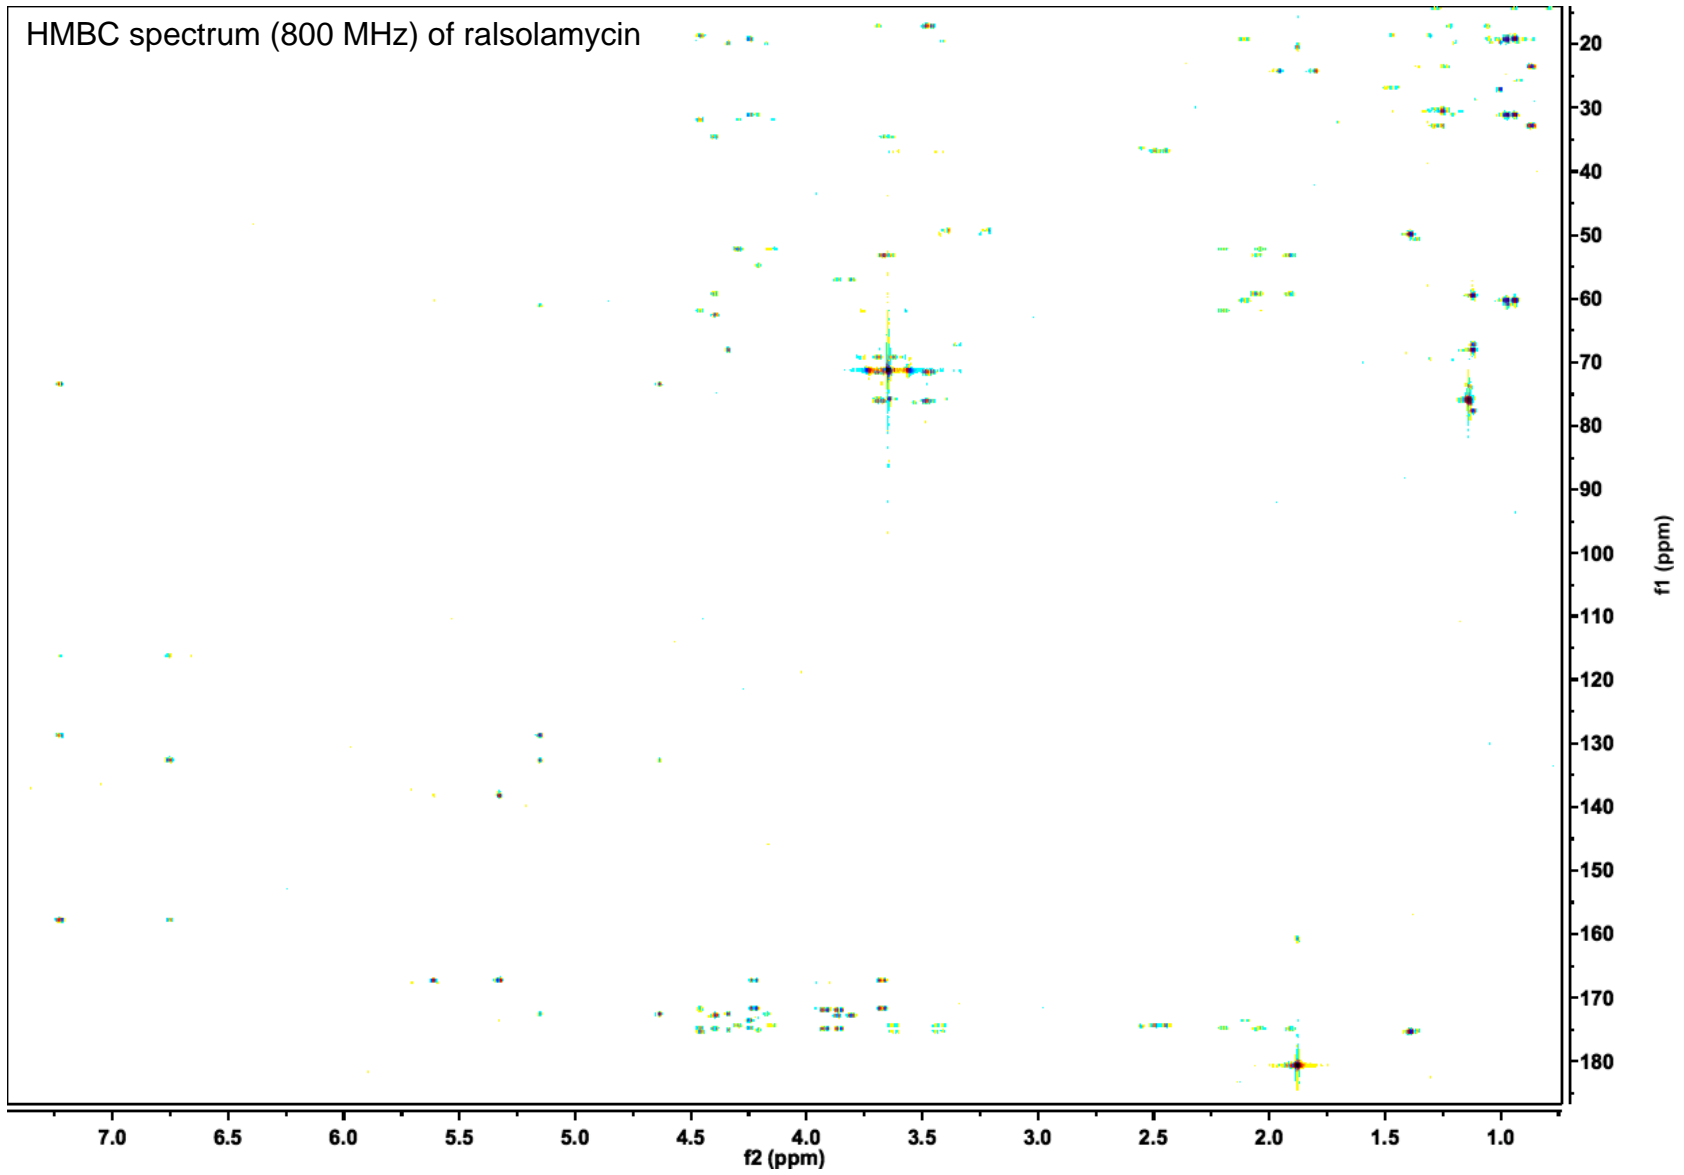

**Table A1.**  $^1\text{H}$  (800 MHz) and  $^{13}\text{C}$  (201 MHz) NMR spectroscopic data for ralsolamycin in  $\text{CD}_3\text{OD}$ ,  $\text{D}_2\text{O}$ , and  $\text{CDCl}_3$  (70:30:1, respectively)

Chemical shifts were referenced to  $\delta(\text{CHD}_2\text{OD}) = 3.31$  ppm and  $\delta(^{13}\text{C}\text{H}_2\text{OD}_3) = 49.00$ .  $^{13}\text{C}$  chemical shifts were determined via HMBC, HSQC and direct observation  $^{13}\text{C}$  spectra.  $^1\text{H}$ ,  $^1\text{H}$ - $J$ -coupling constants were determined from the acquired  $^1\text{H}$  or dqfCOSY spectra. HMBC correlations are from the proton(s) stated to the indicated  $^{13}\text{C}$  atom.

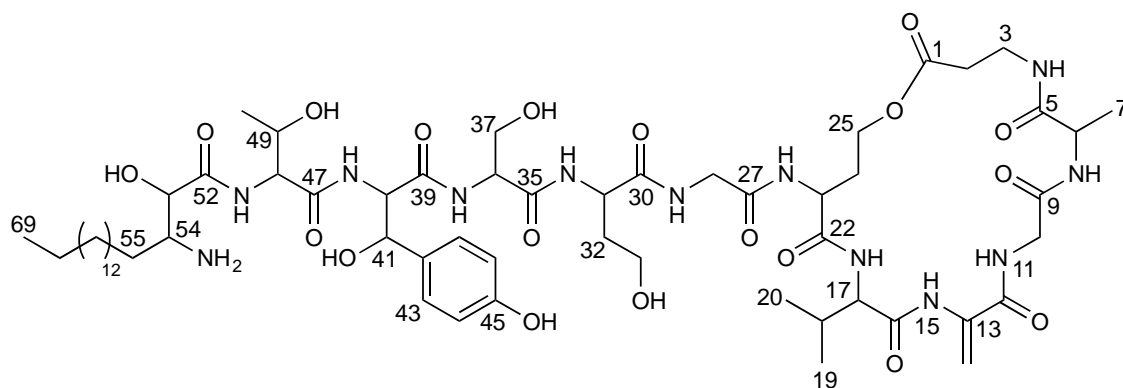

| No. | $\delta_c$ | Proton          | $\delta\text{H}(J_{\text{HH}}[\text{Hz}])$                              | HMBC |
|-----|------------|-----------------|-------------------------------------------------------------------------|------|
| 1   | 174.28     |                 |                                                                         |      |
| 2   | 36.90      | 2- $\text{H}_a$ | 2.47 ( $J_{2a,2b} = 15.0$ ) ( $J_{2a,3a} = 2.5$ ) ( $J_{2a,3b} = 8.0$ ) | 1,3  |
|     |            | 2- $\text{H}_b$ | 2.52 ( $J_{2b,2a} = 15.0$ ) ( $J_{2b,3a} = 8.5$ ) ( $J_{2b,3b} = 2.5$ ) | 1,3  |
| 3   | 36.78      | 3- $\text{H}_a$ | 3.45 ( $J_{3a,3b} = 14.6$ ) ( $J_{3a,2a} = 2.5$ ) ( $J_{3a,2b} = 8.5$ ) | 2,5  |
|     |            | 3- $\text{H}_b$ | 3.65 ( $J_{3b,3a} = 14.6$ ) ( $J_{3b,2a} = 8.0$ ) ( $J_{3b,2b} = 2.5$ ) | 2,5  |
| 4   |            | 4-NH            |                                                                         |      |

|    |        |                   |                                                                        |                   |
|----|--------|-------------------|------------------------------------------------------------------------|-------------------|
| 5  | 175.23 |                   |                                                                        |                   |
| 6  | 49.90  | 6-H               | 4.48 ( $J_{6,7} = 7.2$ )                                               | 5,7,9             |
| 7  | 18.70  | 7-H <sub>3</sub>  | 1.40 ( $J_{7,6} = 7.2$ )                                               | 5,6               |
| 8  |        | 8-NH              |                                                                        |                   |
| 9  | 171.57 |                   |                                                                        |                   |
| 10 | 43.63  | 10-H <sub>a</sub> | 3.69 ( $J_{10a,10b} = 17.4$ )                                          | 9,12              |
|    |        | 10-H <sub>b</sub> | 4.25 ( $J_{10b,10a} = 17.4$ )                                          | 9,12              |
| 11 |        | 11-NH             |                                                                        |                   |
| 12 | 167.18 |                   |                                                                        |                   |
| 13 | 137.22 |                   |                                                                        |                   |
| 14 | 113.40 | 14-H <sub>a</sub> | 5.35 ( $J_{14a,14b} = 1.0$ )                                           | 12                |
|    |        | 14-H <sub>b</sub> | 5.64 ( $J_{14b,14a} = 1.0$ )                                           | 12                |
| 15 |        | 15-NH             |                                                                        |                   |
| 16 | 173.47 |                   |                                                                        |                   |
| 17 | 60.27  | 17-H              | 4.27 ( $J_{17,18} = 9.0$ )                                             | 16,18,19,20,21,22 |
| 18 | 31.17  | 18-H              | 2.14 ( $J_{18,17} = 9.0$ ) ( $J_{18,19} = 6.8$ ) ( $J_{18,20} = 6.8$ ) | 17,19,20          |
| 19 | 19.29  | 19-H <sub>3</sub> | 0.96 ( $J_{19,18} = 6.8$ )                                             | 17,18             |
| 20 | 19.22  | 20-H <sub>3</sub> | 1.00 ( $J_{20,18} = 6.8$ )                                             | 17,18             |
| 21 |        | 21-NH             |                                                                        |                   |
| 22 | 174.68 |                   |                                                                        |                   |
| 23 | 52.19  | 23-H              | 4.49 ( $J_{23,24a} = 9.6$ ) ( $J_{23,24b} = 5.2$ )                     | 22,25,27          |
| 24 | 31.89  | 24-H <sub>a</sub> | 2.08 ( $J_{24a,23} = 9.6$ )                                            | 22                |

|    |        |                   |                                                      |          |
|----|--------|-------------------|------------------------------------------------------|----------|
|    |        | 24-H <sub>b</sub> | 2.23                                                 | 22       |
| 25 | 61.89  | 25-H <sub>a</sub> | 4.18 ( $J_{25a,25b} = 12.0$ )                        | 1,       |
|    |        | 25-H <sub>b</sub> | 4.32 ( $J_{25b,25a} = 12.0$ )                        | 1,       |
| 26 |        | 26-NH             |                                                      |          |
| 27 | 171.86 |                   |                                                      |          |
| 28 | 43.51  | 28-H <sub>a</sub> | 3.89 ( $J_{28a,28b} = 16.5$ )                        | 27,30    |
|    |        | 28-H <sub>b</sub> | 3.95 ( $J_{28a,28b} = 16.5$ )                        | 27,30    |
| 29 |        | 29-NH             |                                                      |          |
| 30 | 174.72 |                   |                                                      |          |
| 31 | 53.19  | 31-H              | 4.42 ( $J_{31,32a} = 8.9$ ) ( $J_{31,32b} = 4.8$ )   | 30       |
| 32 | 34.58  | 32-H <sub>a</sub> | 1.94 ( $J_{32a,31} = 8.9$ )                          | 30,33    |
|    |        | 32-H <sub>b</sub> | 2.09 ( $J_{32b,31} = 4.8$ )                          | 30,33    |
| 33 | 59.20  | 33-H <sub>2</sub> | 3.68                                                 |          |
| 34 |        | 34-NH             |                                                      |          |
| 35 | 172.72 |                   |                                                      |          |
| 36 | 57.02  | 36-H              | 4.42 ( $J_{36,37a} = 5.4$ ) ( $J_{36,37b} = 5.4$ )   | 35,39    |
| 37 | 62.59  | 37-H <sub>a</sub> | 3.82 ( $J_{37a,37b} = 11.3$ ) ( $J_{37a,36} = 5.4$ ) | 35       |
|    |        | 37-H <sub>b</sub> | 3.90 ( $J_{37b,37a} = 11.3$ ) ( $J_{37b,36} = 5.4$ ) | 35       |
| 38 |        | 38-NH             |                                                      |          |
| 39 | 172.48 |                   |                                                      |          |
| 40 | 61.09  | 40-H              | 4.66 ( $J_{40,41} = 4.4$ )                           | 39,42,47 |
| 41 | 73.47  | 41-H              | 5.18 ( $J_{41,40} = 4.4$ )                           | 39,42,43 |



|            |        |                           |                                                  |             |
|------------|--------|---------------------------|--------------------------------------------------|-------------|
| 42         | 134.57 |                           |                                                  |             |
| 43         | 128.66 | 43-H <sub>2</sub>         | 7.26 ( $J_{43,44} = 8.5$ )                       | 41,43,45    |
| 44         | 116.11 | 44-H <sub>2</sub>         | 6.78 ( $J_{44,43} = 8.5$ )                       | 42,44       |
| 45         | 157.69 |                           |                                                  |             |
| 46         |        | 46-NH                     |                                                  |             |
| 47         | 172.46 |                           |                                                  |             |
| 48         | 59.51  | 48-H                      | 4.36 ( $J_{48,49} = 3.9$ )                       | 47,49,50,52 |
| 49         | 68.07  | 49-H                      | 4.20 ( $J_{49,48} = 3.9$ ) ( $J_{49,50} = 6.4$ ) | 52          |
| 50         | 19.88  | 50-H <sub>3</sub>         | 1.15 ( $J_{50,49} = 6.4$ )                       |             |
| 51         |        | 51-NH                     |                                                  |             |
| 52         | 174.96 |                           |                                                  |             |
| 53         | 74.98  | 53-H                      | 4.23 ( $J_{53,54} = 4.7$ )                       | 52,54       |
| 54         | 54.81  | 54-H                      | 3.22 ( $J_{54,53} = 4.7$ )                       |             |
| 55         | 32.17  | 55-H <sub>2</sub>         | 1.46                                             |             |
| 56-<br>66* | 30.50  | 56-67-<br>H <sub>22</sub> | 1.27                                             |             |
| 67         | 32.80  | 67-H <sub>2</sub>         | 1.27                                             |             |
| 68         | 23.53  | 68-H <sub>2</sub>         | 1.31 ( $J_{68,69} = 7.2$ )                       |             |
| 69         | 13.43  | 69-H <sub>3</sub>         | 0.88 ( $J_{69,68} = 7.2$ )                       | 67,68       |
