# Supplementary material for: Conserved Responses in a War of Small Molecules between a Plant-Pathogenic Bacterium and Fungi
Source: PubMed Central journal article supplement (PMC5964348; doi:10.1128/mbio.00820-18), 2018-05-22
Supplement: mbo001183899st1.pdf [file mbo001183899st1.pdf]

|               | Bac+ | Bac- | Totals |
|---------------|------|------|--------|
| WT            | 3    | 151  | 154    |
| $\Delta$ bik1 | 20   | 281  | 301    |
| Totals        | 23   | 432  | 455    |

K (degrees of freedom) = 1

$X^2$  stat = 4.682

p = 0.0305
