# Supplementary material for: Conserved Responses in a War of Small Molecules between a Plant-Pathogenic Bacterium and Fungi
Source: PubMed Central journal article supplement (PMC5964348; doi:10.1128/mbio.00820-18), 2018-05-22
Supplement: mbo001183899st2.pdf [file mbo001183899st2.pdf]

| <b>Compound</b>    | <b>Molecular Weight</b> | <b>Formula</b> | <b>ANOVA p</b> |
|--------------------|-------------------------|----------------|----------------|
| Moniliformin       | 98.06                   | C4H2O3         | na             |
| Beauvericin        | 783.96                  | C45H57N3O9     | 0.0079         |
| Fusarubin          | 306.27                  | C15H14O7       | na             |
| Fumonisin B1       | 721.84                  | C34H59NO15     | 0.0687         |
| Fumonisin B2       | 705.83                  | C34H59NO14     | na             |
| Fusaric acid       | 179.22                  | C10H13NO2      | na             |
| Bikaverin          | 382.32                  | C20H14O8       | 0.003          |
| Fusarin C          | 431.49                  | C23H29NO7      | 0.1043         |
| GA3                | 346.38                  | C19H22O6       | na             |
| GA4                | 332.4                   | C19H24O5       | 0.1587         |
| GA7                | 330.38                  | C19H22O5       | 0.0914         |
| Apicidin           | 622.8                   | C34H48N5O6     | na             |
| Apicidin-like      | 645.3                   | C35H42O7N5     | na             |
| Fujikurin A        | 224.25                  | C12H16O4       | na             |
| Fujikurin B        | 242.27                  | C12H18O5       | na             |
| Fujikurin C/D      | 226.27                  | C12H18O4       | 0.3155         |
| Caryophyllene      | 204.35                  | C15H24         | 0.3268         |
| Neurosporaxanthin  | 498.74                  | C35H46O2       | na             |
| $\alpha$ -acorenol | 222.37                  | C15H26O        | 0.3184         |
