# Supplementary material for: Conserved Responses in a War of Small Molecules between a Plant-Pathogenic Bacterium and Fungi
Source: PubMed Central journal article supplement (PMC5964348; doi:10.1128/mbio.00820-18), 2018-05-22
Supplement: mbo001183899st3.pdf [file mbo001183899st3.pdf]

| Isolate tested                        | Test Agent  | Minimum Inhibitory Concentration (µg/ml) |                             |     |    | $\Sigma$ FIC <sub>mean</sub> <sup>c</sup> | FIC interpretation |
|---------------------------------------|-------------|------------------------------------------|-----------------------------|-----|----|-------------------------------------------|--------------------|
|                                       |             | Alone <sup>a</sup>                       | In combination <sup>b</sup> |     |    |                                           |                    |
| <i>Ralstonia solanacearum</i> GMI1000 | Bikaverin   | 60                                       | 7.5                         | 15  | 30 | 0.708                                     | Additive           |
|                                       | Beauvericin | 240                                      | 120                         | 120 | 60 |                                           |                    |
