# Supplementary material for: Conserved Responses in a War of Small Molecules between a Plant-Pathogenic Bacterium and Fungi
Source: PubMed Central journal article supplement (PMC5964348; doi:10.1128/mbio.00820-18), 2018-05-22
Supplement: mbo001183899st4.pdf [file mbo001183899st4.pdf]

| <b>Primer name</b> | <b>Sequence (5'-3')</b> | <b>Use</b>           |
|--------------------|-------------------------|----------------------|
| bik1-F             | TCGAATCAGGAGGAGCTTGT    | Semiquantitative PCR |
| bik1-R             | GACCATAGATGGGAGCTGGA    | Semiquantitative PCR |
| bik2-F             | TTGATCAGCTTGGTCTCGTG    | Semiquantitative PCR |
| bik2-R             | GGTTCAGGCAGCTTTGAGTC    | Semiquantitative PCR |
| bik3-F             | CGCAGGTTGCTAAGGAGAAG    | Semiquantitative PCR |
| bik3-R             | AGCATTGAAAGCTGCCTTGT    | Semiquantitative PCR |
| actA-F             | CCTGCTTGGAGATCCACATT    | Semiquantitative PCR |
| actA-R             | CTTCCAGCCTTCTGTCCTTG    | Semiquantitative PCR |
